# Supplementary material for: Laser Capture Microdissection Coupled Capillary Immunoassay to Study the Expression of PCK-2 on Spatially-Resolved Islets of Rat Langerhans
Source: Pharmaceutics. 2021 Jun 15;13(6):883. doi: 10.3390/pharmaceutics13060883 (PMC8232303; doi:10.3390/pharmaceutics13060883)
Supplement: Supplementary file 1 [file pharmaceutics-13-00883-s001.zip › pharmaceutics-1232955-supplementary.pdf]

# Supplement Materials: Laser Capture Microdissection Coupled Capillary Immunoassay to Study the Expression of PCK-2 on Spatially-Resolved Islets of Rat Langerhans

Shashank Pandey, Zdenek Tuma, Tereza Smrhova, Miroslava Cedikova, Tereza Macanova and Magdalena Chottova Dvorakova

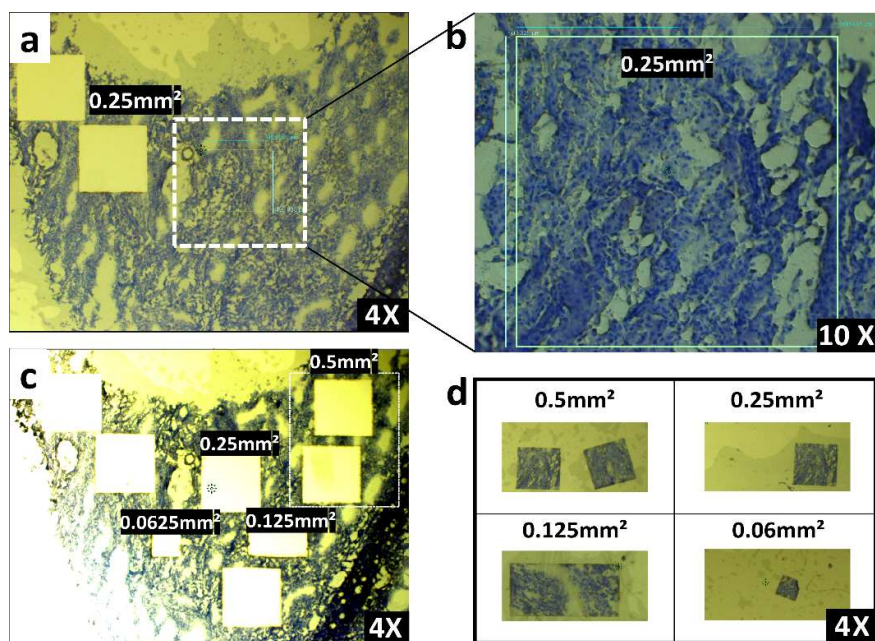

**Figure S1.** Hematoxylin stained rat kidney tissue of 10  $\mu\text{m}$  thickness. (a) 0.25  $\text{mm}^2$  of tissue sections marked for cutting through laser at 4 $\times$  resolution. (b) 0.25  $\text{mm}^2$  of stained tissue sections marked for cutting through laser at 10 $\times$  resolution. (c) Stained tissue sections after cutting of all the sections (0.5  $\text{mm}^2$ , 0.25  $\text{mm}^2$ , 0.125  $\text{mm}^2$  and 0.0625  $\text{mm}^2$ ) at 4 $\times$  resolution. (d) Tissue samples captured after laser cutting.

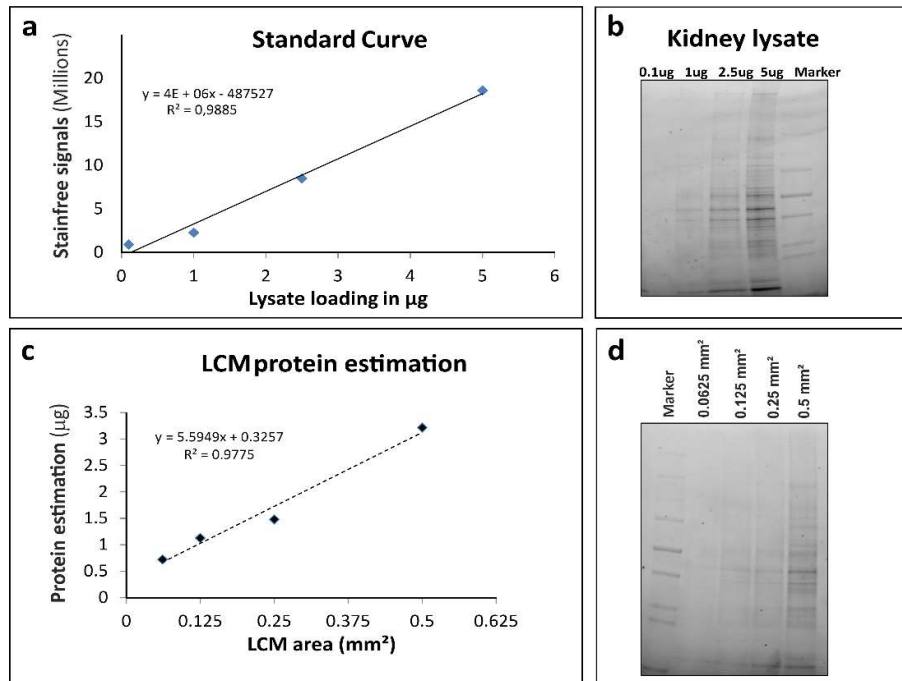

**Figure S2.** Calibration curve for protein estimation of LCM sample. (a) Rat kidney lysate was used to prepare the calibration curve. Calibration curve was linear with ( $R^2 = 0.98$ ). (b) Rat kidney lysate proteins of known concentration (0.1  $\mu\text{g}$ , 1  $\mu\text{g}$ , 2.5  $\mu\text{g}$  and 5  $\mu\text{g}$ ) were examined onto 10% SDS- PAGE (Stain free gel, Bio-Rad). (c) Linear curve of proteins extracted from different LCM samples of rat kidney (0.5  $\text{mm}^2$ ; 0.25  $\text{mm}^2$ ; and 0.125  $\text{mm}^2$ ). Protein estimation in  $\mu\text{g}$  (y axis) versus LCM area sections (x axis). Calibration curve was linear with ( $R^2=0.98$ ). (d) Proteins extracted from LCM samples of rat kidney with different areas (0.5  $\text{mm}^2$ , 0.25  $\text{mm}^2$  and 0.125  $\text{mm}^2$ ) were examined onto 10% SDS- PAGE (Stain free gel, Bio-Rad) and presented at **Table S1**.

**Table S1.** Estimated total protein amount for each LCM section area.

| LCM section area ( $\text{mm}^2$ ) | Protein amount in section ( $\mu\text{g}$ ) |
|------------------------------------|---------------------------------------------|
| 0.0612                             | 0.597                                       |
| 0.1250                             | 0.658                                       |
| 0.2500                             | 1.412                                       |
| 0.5000                             | 2.875                                       |
| 1.0000                             | 3.074                                       |

**Table S2.** Normalized values of PCK2 in  $\beta$ -cells of diabetic and control groups for each animal.

| Animals | Average of Signal Ratio (PCK2/ACTB) |          |
|---------|-------------------------------------|----------|
|         | Diabetic                            | Control  |
| 1       | 28,51706                            | 9,882957 |
| 2       | 17,29695                            | 8,59383  |
| 3       | 30,46167                            | 15,78045 |
| 4       | 25,86456                            | 9,16841  |
| 5       | 13,64311                            | 8,410773 |
| 6       | 19,91703                            | 6,295529 |
